1 **Termites have developed wider thermal limits to cope with environmental conditions in**  
2 **savannas**

3  
4 Authors: Joel S. Woon <sup>1,2\*</sup>, David Atkinson <sup>3</sup>, Stephen Adu-Bredu <sup>4,5</sup>, Paul Eggleton <sup>2†</sup> & Catherine L.  
5 Parr <sup>1,6,7†</sup>

6  
7 \* Corresponding Author- [j.woon@liverpool.ac.uk](mailto:j.woon@liverpool.ac.uk)

8 † - Please note these authors contributed equally to the manuscript.

9 <sup>1</sup> – School of Environmental Sciences, University of Liverpool, Liverpool, UK

10 <sup>2</sup> – Department of Life Sciences, Natural History Museum, London, UK

11 <sup>3</sup> – Department of Evolution, Ecology and Behaviour, University of Liverpool, UK

12 <sup>4</sup> – CSIR-Forestry Research Institute of Ghana, Kumasi, Ghana

13 <sup>5</sup> – Department of Natural Resources Management, CSIR College of Science and Technology, Kumasi  
14 Ghana

15 <sup>6</sup> – Department of Zoology & Entomology, University of Pretoria, Pretoria, South Africa

16 <sup>7</sup> – School of Animal, Plant and Environmental Sciences, University of the Witwatersrand, Wits,  
17 South Africa

18

19 Key words – Adaptation; Blattodea; Ectotherms; Termitoidae; Physiology; Thermal Tolerance;  
20 Tropics

21

22

23

24

25

26

27

## 28 **Abstract**

29 The most diverse and abundant family of termites, the Termitidae, evolved in warm, wet African  
30 tropical forests. Since then, they have colonised grassy biomes such as savannas. These  
31 environments have more extreme temperatures than tropical forests, and greater temporal  
32 fluctuations (both annually and diurnally) that are challenging for soft-bodied ectotherms. We  
33 propose that that a likely mechanism that facilitated the expansion from forest to savanna was the  
34 widening of physiological limits of savanna termite species in order to cope with more extreme  
35 environmental conditions. We sampled termites directly from mound structures across an  
36 environmental gradient in Ghana, and recorded the thermal tolerance of individual termites, both  
37 critical thermal maximum ( $CT_{max}$ ) and critical thermal minimum ( $CT_{min}$ ). We estimated colony thermal  
38 tolerance by taking an average of each tested individual, and modelled these data against several  
39 environmental factors (canopy cover above the mound, rainfall and temperature). We found that  
40 savanna termite species had significantly higher  $CT_{max}$  values, and significantly lower  $CT_{min}$  values,  
41 than forest species. In addition, areas with high canopy cover were significantly associated with low  
42  $CT_{max}$  values, and areas with higher average daily rainfall were significantly associated with higher  
43  $CT_{min}$  values. Our results suggest that the widening of thermal tolerances has occurred in savanna  
44 termite species, probably in response to the more extreme temperatures found in those  
45 environments.

46

47

## 48 **Introduction**

49 In the terrestrial tropics, there are two dominant biomes: tropical forests and grassy biomes  
50 (savannas and grasslands; Mokany, Raison and Prokushkin, 2006; Parr *et al.*, 2014). The spatial  
51 distribution of these tropical environments has changed over time, as climatic conditions have  
52 varied. Notably, in the late Miocene and into the Pliocene, there was a major expansion of savanna  
53 grasslands (Cerling *et al.*, 1993; Cerling *et al.*, 1997; Davies *et al.*, 2020; Pagani *et al.*, 1999), which  
54 coincided with the adaptive radiation of  $C_4$  grasses (Christin *et al.*, 2013; Bouchenak-Khelladi *et al.*,  
55 2014), and a recession of tropical forests. The expansion of savannas offered novel habitats for  
56 forest species to colonise, and while this provided opportunity for radiation of species, it also posed  
57 specific challenges. Understanding how species radiating from forest to savannas have overcome  
58 these challenges is vital for accurately predicting biogeographical history, making inferences of their  
59 current ecology, and predicting how these species may be affected by climate change

60 Tropical forests and grassy biomes have markedly different environmental conditions. Forests have  
61 greater levels of canopy connectivity, rainfall, humidity (both relative humidity and vapour pressure  
62 deficit) and, typically, lower mean temperatures with a smaller thermal range (Nicholls and Wong,  
63 1990; Sternberg, 2001; Tang et al., 2019). In contrast, tropical grassy biomes tend to have more  
64 extreme conditions than tropical forests, both spatially with more variable light and therefore  
65 temperature regimes, and also temporally over seasonal and diurnal timescales. Specifically,  
66 savanna conditions vary annually with pronounced dry seasons and large variation in temperature,  
67 humidity and rainfall across the year (D'Onofrio et al., 2019), but also diurnally, with the more open  
68 environment allowing for more extreme differences in environmental conditions throughout a 24-  
69 hour period (due to higher levels of heat, and insolation, at ground level during the day, and a  
70 greater amount of heat loss during the night, when compared with forest; Hardwick et al., 2015).

71 Despite these environmental differences, a number of taxa have radiated from forests to savannas,  
72 adapting to the novel environmental challenges that savannas pose. For example, adaptations of  
73 grasses to open tropical environments (Bouchenak-Khelladi et al., 2014; Christin et al., 2013; Pagani  
74 et al., 1999) include the notable dominance of C<sub>4</sub> grasses in savannas, compared with the  
75 prevalence of C<sub>3</sub> grasses in tropical forests (Adjorlolo et al., 2012; Still et al., 2014;  
76 Solofondranohatra et al., 2018). The generally more open canopy of savannas increases light  
77 availability for grass species which, coupled with the increased temperatures and decreased water  
78 availability, makes C<sub>4</sub> photosynthesis more efficient than C<sub>3</sub> (Still et al., 2014; Solofondranohatra et  
79 al., 2018). In contrast, in forests the low understory light levels and higher water availability favour  
80 C<sub>3</sub> photosynthesis over C<sub>4</sub> (Pearcy and Ehleringer, 1984; Solofondranohatra et al., 2018). Savanna  
81 grasses are also commonly taller and more tussocky, which allows them to compete for light more  
82 efficiently (Solofondranohatra et al., 2018). In addition, savanna species tend to be harder to  
83 decompose, with a higher C:N ratio, which also facilitates burning (Simon and Pennington, 2012;  
84 Solofondranohatra et al., 2018). Forest grass species, on the other hand, tend to be creeping, low-  
85 stature species, with large leaves to maximise light intake in the understory, and have structures to  
86 minimise self-shading (Solofondranohatra et al., 2018). Closely related plant species can therefore  
87 have very different evolutionary strategies to maximise their fitness in different tropical biomes.

88 Closely related animal species can also have radically different adaptations in different tropical  
89 environments. *Bicyclus* butterflies, important pollinators in both tropical African forest and savanna  
90 ecosystems (Dierks and Fischer, 2008), evolved a suite of traits when they colonised savannas from  
91 tropical forests, including diapause during the dry season, probably triggered by the lack of available

92 suitable surfaces (grasses) for oviposition, which is in contrast to the forest species of *Bicyclus*, which  
93 do not have a period of diapause and are able to reproduce all year round (Halali et al., 2020).

94 However, little is known about how other invertebrate groups may have adapted to the novel  
95 environment that savannas present. The Termitidae, the most abundant and diverse group of  
96 termites (henceforth all mention of termites refers to the Termitidae family), also evolved inside  
97 tropical forests in central Africa (Eggleton, 2000; Aanen and Eggleton, 2005; Bourguignon et al.,  
98 2015). Since then they have radiated from forests into more open tropical environments (Aanen and  
99 Eggleton, 2005). Forests typically have higher generic and species richness than savannas, although  
100 some genera occur in both habitats. However, despite these shared genera, there are almost no  
101 shared species between the two environments (Evouna Ondo et al., unpublished data), suggesting  
102 that while genera have radiated into savannas, they have since speciated and adapted to savanna  
103 environments. Similar to *Bicyclus* butterflies, savanna environments would have posed new  
104 challenges to colonising termite species. Termites are soft-bodied ectotherms, and extremely  
105 susceptible to desiccation (Heath et al., 1971; Willmer, 1982), and would be challenged by the higher  
106 temperatures and lower humidity in savannas. Yet, despite the more extreme conditions, termites  
107 have colonised, diversified, and become ecologically dominant in savannas, with a comparable level  
108 of biomass to large ungulates or elephants (Dangerfield et al., 1998; Støen et al., 2013). Termites are  
109 the dominant soil invertebrate across tropical ecosystems, contributing to multiple ecosystem  
110 processes including decomposition, nutrient cycling and bioturbation (Bottinelli et al., 2015; Fox-  
111 Dobbs et al., 2010; Joseph et al., 2014; Jouquet et al., 2016; Turner, 2019). As ecosystem engineers,  
112 they influence these processes at landscape scales (Davies et al., 2014; Davies et al., 2016a), altering  
113 the spatial distribution of nutrients and, as a result, plant species distributions (Davies et al., 2016b;  
114 Davies et al., 2016a; Joseph et al., 2014; Støen et al., 2013).

115 How termites have been able to colonise and to adapt to savanna conditions is currently uncertain.  
116 Termites have very different life history traits compared with other invertebrates (Poissonnier et al.,  
117 2018; Porter and Hawkins, 2001; Roisin, 2000); most termite species produce complex nest  
118 structures, and/ or live underground (Jones and Oldroyd, 2006; Noirot and Darlington, 2000). These  
119 subterranean environments could protect and buffer termites from extreme environmental  
120 conditions, maintaining stable and ideal nest conditions (Gouttefarde et al., 2017; Jones and  
121 Oldroyd, 2006; Korb, 2003). The adaptation of nest structures to provide more efficient  
122 thermoregulatory properties, such as altering the external shape to interact with the external  
123 temperature to maintain more stable internal conditions (Ocko et al., 2017; Singh et al., 2019; Vesala  
124 et al., 2019), may have helped enable forest termite species to colonise and prosper in savanna

125 environments. This thermoregulation of nests could be particularly important for fungus-growing  
126 termites, the subfamily Macrotermitinae within the termitids, which farm fungus from the genus  
127 *Termitomyces* (Wood and Thomas, 1989). Maintaining ideal growing conditions for their fungus  
128 symbionts would increase colony fitness, so the adaptation of nest thermoregulatory properties  
129 would be vital for the success of Macrotermitinae species (Korb and Linsenmair, 2000; Korb, 2003).

130 While nest thermoregulation is likely to be important in facilitating the movement from forest to  
131 savanna, termites forage outside the controlled environment of their nest, often on the surface,  
132 risking exposure to extreme environmental conditions (Legendre et al., 2008; Traniello and Leuthold,  
133 2000). One additional key mechanism facilitating the expansion of termites into savanna is the  
134 evolution of wider physiological tolerances. Interspecific variation in thermal limits has been shown  
135 to occur across different latitudes in other invertebrate lineages (Diptera, *Drosophila* - Rajpurohit,  
136 Parkash and Ramniwas, 2008; Kellermann *et al.*, 2012; various, but dominated by Coleoptera,  
137 Hymenoptera and Odonata - Sunday *et al.*, 2014) and with exposure to higher temperatures  
138 (Diptera, *Drosophila* - Parkash, Rajpurohit and Ramniwas, 2008; Hymenoptera, Formicidae - Kaspari  
139 *et al.*, 2015) with closely related species demonstrating significantly different thermal tolerances.  
140 The extension of termite physiological tolerances may have enabled them to withstand the more  
141 variable conditions and colonise savannas. However, few studies have documented the physiological  
142 limits of soil insects, including termites (but see, Woon et al., 2018), so the patterns observed in  
143 other studies may not hold across all insect orders.

144 In recent years, an increased focus on the thermal niche of species (Gvoždík, 2018; Kearney et al.,  
145 2010; Porter and Kearney, 2009; Sunday et al., 2014), has produced hypotheses to explain thermal  
146 performance, particularly given climate change concerns (Buckley et al., 2013; Clusella-Trullas et al.,  
147 2011; Huey et al., 2012; Kearney and Porter, 2009; Sunday et al., 2011). These studies and  
148 hypotheses have contributed to developing the Thermal Adaptation Hypothesis (Angilletta et al.,  
149 2002; Angilletta, 2009; Huey and Kingsolver, 1989; Kaspari et al., 2015; Kingsolver and Gomulkiewicz,  
150 2003), which states that species should be adapted to the thermal niche of their environment,  
151 therefore suggesting that species found in thermally more variable environments should have wider  
152 thermal ranges (Angilletta, 2009). In addition, the thermal adaptation hypothesis suggests that  
153 species in more thermally stable environments, as well as having narrower thermal ranges, should  
154 be operating closer to their thermal optimum (Angilletta, 2009). In the context of our study system,  
155 tropical forests have much more stable environmental conditions, whereas savannas have more  
156 extreme limits and more variation, so we would expect savanna species to have wider and more  
157 extreme physiological limits to adapt to their environment.

158 Here, we test the hypothesis that savanna termite species have wider physiological limits, which are  
159 likely to have facilitated their colonisation and speciation within savanna ecosystems. We quantify  
160 the thermal limits (critical thermal minima [ $CT_{min}$ ] and critical thermal maxima [ $CT_{max}$ ]) of the most  
161 abundant mound-building termite species across tropical forest and savanna areas in Ghana, to test  
162 whether savanna species have more extreme physiological limits than forest species. We assess  
163 these data and discuss the applicability of the thermal adaptation hypothesis.

164 We predict from our hypothesis that (1) termite species from savannas will have higher  $CT_{max}$  values  
165 than forest species, and that (2) they will have lower  $CT_{min}$  values. We correlated the physiological  
166 tolerances with climatic factors that change across the environmental gradient (from forest to  
167 savanna), temperature, rainfall and canopy cover, to determine which, if any, may be more strongly  
168 associated with physiological limits.

169

170

## 171 **Materials and Methods**

### 172 **Sampling Locations**

173 Termites were sampled from four locations in Ghana across two different biomes: tropical rainforest  
174 and Guinea savanna. The three forest locations were: Bobiri Forest Reserve, a moist semi-deciduous  
175 forest in the Ashanti Region, a matrix of forest patches that have been, or currently are, logged (all  
176 colonies sampled from fragments that have not been logged for at least 20 years); the Forestry  
177 Research Institute of Ghana (FoRIG) Campus, a moist semi-deciduous forest patch located on the  
178 campus at Fumesua, near Kumasi, in the Ashanti Region; and the Assin-Attandanso Resource  
179 Reserve side of the Kakum Conservation Area, a moist evergreen tropical forest that has been  
180 unlogged since 1990 (Wiafe, 2016), in the Central Region. Termites were sampled from a single  
181 savanna site, Mole National Park, a large unfenced protected area in the Savannah Region, between  
182 June and July 2019. Sampling in all locations was conducted during the end of the dry season and the  
183 start of the wet season. Termites were sampled during the end of the dry season and start of the  
184 wet season at all sites: between January and March 2019 for the three forest sites, and June and July  
185 2019 for the savanna site (Table 1).

186 *Table 1 here.*

### 187 **Termite and Environmental Sampling**

188 We sampled termites directly from termite mounds, identified to genus level (based on their  
189 diagnostic mound structures), which we located using directed searching, using the knowledge and  
190 experience of the field assistants. Two mounds were sampled per day, typically between 07h00 and  
191 09h00. Target mounds were broken open and we collected termites, as well as some mound  
192 material, and placed them into a cool box to protect the termites from external conditions and  
193 reduce stress that could affect their thermal tolerances while being transported to the laboratory.  
194 The sample from each colony was placed in a separate container to prevent interaction between the  
195 two colonies. Where possible, both worker and soldier castes were sampled. The time between  
196 sampling and experimentation was reduced as much as possible (mean = 122.6 mins, sd =  $\pm 81.4$   
197 min). The large standard deviation is attributed to having a single collection, but running two  
198 experiments, per day. The same colonies that were sampled were used in two experiments, one  
199 testing thermal maximum and one testing thermal minimum (the order of which was decided  
200 randomly); hence, the individuals used in the second experiment were kept inside the cool box  
201 (which was out of direct sunlight) while the first experiment took place.

202 We photographed each mound to assist with species identification. Canopy cover above each  
203 sampled mound was quantified using a hemispherical fish-eye lens (Canon EOS 70D camera, Sigma  
204 4.5mm f/1:2.8 Circular Fisheye Lens). For large mounds the image was taken directly above the apex  
205 of the mound, but with small mounds (<75 cm in height) the image was taken above the mound at a  
206 height of 75 cm due to the height of the stabilising monopod. Due to variable light conditions when  
207 the images were taken, we did not standardise ISO, shutter-speed or aperture, although variation in  
208 these settings were reduced as much as possible. Variable light conditions and camera settings were  
209 corrected using Gap Light Analyzer software (GLA; Frazer et al., 1999). The approximate leaf-area  
210 index above each mound was then calculated as a measure of canopy cover. Leaf-area index is a  
211 measurement of the quantity of leaf area in a canopy per unit area of ground, and ranges from 0 (no  
212 leaf cover) to 6 (complete leaf cover).

213

## 214 **Thermal Tolerance Experiments**

215 We used similar methods to those outlined in Bishop et al. (2017) to estimate the thermal tolerance  
216 of the termites. Fourteen individuals from each of two colonies (28 in total) were tested per  
217 experimental run. Only individuals of the helper castes, workers and soldiers, were used in the  
218 experiments Each termite was placed into a separate microcentrifuge tube. The tubes were then  
219 placed into a dry heat bath (Tropicooler 260014-2, Boekel Scientific, Feasterville, PA, USA;



220 temperature range  $-19^{\circ}\text{C}$  to  $69^{\circ}\text{C}$  and an accuracy of  $\pm 1^{\circ}\text{C}$ ). The heat bath contained two aluminium  
221 inserts with each consisting of 14 wells, each of which held a single microcentrifuge tube. Individuals  
222 from two colonies and different castes were randomly allocated to different wells to remove  
223 potential equipment bias. The two colonies sampled each day were used in each experimental run  
224 ( $\text{CT}_{\text{max}}$  and  $\text{CT}_{\text{min}}$ ) and each colony was tested for both  $\text{CT}_{\text{max}}$  and  $\text{CT}_{\text{min}}$ ; however, each individual  
225 termite was only used in one experiment.

226 The temperature within each microcentrifuge tube was acclimated for 15 minutes.  $\text{CT}_{\text{max}}$   
227 experiments had an acclimation temperature of  $30^{\circ}\text{C}$ , and  $\text{CT}_{\text{min}}$  had an acclimation temperature of  
228  $24^{\circ}\text{C}$ . After the acclimation period, the temperature was changed by  $1^{\circ}\text{C}$  (raised for a  $\text{CT}_{\text{max}}$   
229 experiment, and lowered for  $\text{CT}_{\text{min}}$ ), and maintained at each new temperature for a further three  
230 minutes. Following this three-minute period, we checked each termite for loss of muscle co-  
231 ordination ( $\text{CT}_{\text{max}}$ ) or lack of movement ( $\text{CT}_{\text{min}}$ ) by flicking the microcentrifuge tube. If we noticed the  
232 termite lost muscle co-ordination ( $\text{CT}_{\text{max}}$ ) or had stopped moving ( $\text{CT}_{\text{min}}$ ) the temperature was taken  
233 as the thermal limit of that individual termite. The experimental run was ended when the thermal  
234 limit of all 28 termites was recorded.

### 235 **Termite Identification**

236 Termite colonies were identified to genus level in the field based on their mound structure. All  
237 termites used in experimental runs were preserved in 70% ethanol and brought to the UK. We took  
238 an individual from each colony and DNA was extracted from each sample. The *COII* mitochondrial  
239 gene was amplified and sequenced using Sanger Sequencing at the Natural History Museum,  
240 London. Each sequence was matched with the most closely related sequence on NCBI using BLAST  
241 (Johnson et al., 2008). If the sequences had a unique high likelihood identity match ( $>98\%$ ) with a  
242 single species described on the NCBI database, that sample, and therefore the colony it was sampled  
243 from, was considered identified as that species. If there was not a unique high likelihood identity  
244 match, the sequences (and therefore the colonies from which each sample was taken) were grouped  
245 and labelled as an unspecified species within a genus (for example, *Cubitermes sp. A*, Fig. 1). After  
246 identification, species that did not have at least three replicates per sampling location were removed  
247 from the dataset (19 colonies removed, present in online dataset). Since the genetic identification  
248 was conducted, the genus *Cubitermes* was split into several genera (Hellemans et al., 2020).  
249 However, there were limited sequence data for the new classifications so we have treated all the  
250 new genera as *Cubitermes sensu lato*.

### 251 **Climate Data**



252 Climate data was sourced from the WorldClim2 dataset (Fick and Hijmans, 2017) using the ‘raster’  
253 package (Hijmans et al., 2020) in the R statistical software version 3.6.2 (R Core Team, 2019).  
254 WorldClim2 gets average measurements of climatic variables each month, based on an interpolated  
255 dataset between 1970 and 2000. We extracted measurements of average monthly rainfall, average  
256 monthly maximum temperature, and average monthly minimum temperature to the highest  
257 resolution possible (30 arc seconds, equivalent to approximately 1km<sup>2</sup>) for each mound we sampled.  
258 From these data we obtained average daily rainfall, highest average maximum temperature and  
259 lowest average minimum temperature for the area around each colony centre.

260

## 261 **Statistical Analysis**

262 After genetic identification, eight species had a sample size of three colonies and were included in  
263 the statistical analyses. Three of those species were sampled from the two savanna locations (Mole  
264 North, Mole South, Table 1), and six species were sampled from the forest locations (FoRIG, Bobiri,  
265 Kakum Forest and Kakum Farmland, Table 1). One species, *Macrotermes bellicosus*, was sampled in  
266 both savanna and forest locations, but it was only found in the forest environment that was heavily  
267 disturbed, Kakum Farmland (Table 1).

268 All statistical analyses used the R statistical package version 3.6.2 (R Core Team, 2019). We  
269 calculated the estimated colony CT<sub>max</sub> and CT<sub>min</sub> by taking the average of the thermal tolerance of  
270 each termite within that colony that was used in an experimental run. Initially, basic Welch’s two-  
271 sample t-tests were run to compare the thermal tolerances of species assemblages sampled in forest  
272 and savanna environments (termites sampled from Kakum Farmland were not included, Table 1). A  
273 t-test was also used to compare *Macrotermes bellicosus* thermal tolerances in two different  
274 environment types (farmland and savanna), and a one-way analysis of variance test was used to  
275 compare the thermal tolerances of the three *Cubitermes* species sampled. Tukey’s HSD post-hoc  
276 statistics were used for pairwise comparisons of the species thermal tolerances.

277 To test whether environmental variables affect termite colony thermal limits, mixed effects models  
278 were fitted using the R package ‘lme4’ (Bates et al., 2019), with a separate model for CT<sub>max</sub> and CT<sub>min</sub>.  
279 Maximal models tested the interactive effects of canopy cover, average daily rainfall (which was  
280 rescaled from annual rainfall) at the mound, and temperature at the mound (maximum temperature  
281 for the CT<sub>max</sub> model, and minimum temperature for the CT<sub>min</sub> model). A single random effect of  
282 colony location (as listed in Table 1, Fig. S1) was used to account for additional unmeasured  
283 environmental differences. Species was not included as a random effect (crossed or nested) because

284 there was little overlap in species composition between sampling locations, and so both site and  
285 species would therefore explain the same variation, and so there was not enough data to prevent  
286 non-convergence.

287 To understand which of the fixed effects and their interactions best explained the variation in  
288 termite thermal tolerances, two lists of candidate models were generated (one for  $CT_{max}$  and one for  
289  $CT_{min}$ ) using the 'dredge' function from the 'MuMIn' package (Bartoń, 2019). This takes the maximal  
290 model and systematically removes variables and/ or interactions until all possible combinations have  
291 been tested, and compared these complete lists of models using the package 'AICcmodavg'  
292 (Mazerolle and Linden, 2019). The model with the lowest corrected AIC (AICc) value was obtained,  
293 and the other models with a difference in AICc ( $\Delta AICc$ ) of less than two were retained to inform the  
294 final 'full' model (Table S1 and Table S2; Burnham and Anderson, 2002). Model averaging, using the  
295 candidate lists of the model with the lowest AICc value and all those with  $\Delta AICc < 2$ , was used to  
296 identify the best predictor variables across the models. The relative importance of these predictors  
297 was calculated as the sum of their relative Akaike weights from all models in which they appear;  
298 thus, models with lower AICc values contribute more to the final 'full' model. A series of  $F$  tests was  
299 also conducted to verify the significance of the retained parameters on the thermal limits of the  
300 termite species tested in the final models. This process was conducted for two separate model sets,  
301 one testing  $CT_{min}$  and the other  $CT_{max}$ , generating two 'full' models.

302

303

## 304 **Results**

305 A total of 2042 termite specimens from 71 colonies and eight species were used in the final analyses  
306 (1022 termites for  $CT_{max}$  experiments, 1020 termites for  $CT_{min}$  experiments). There was a large  
307 amount of interspecific variation in thermal tolerance, with species averages varying by 4.86°C for  
308 their  $CT_{max}$  and 2.96°C for their  $CT_{min}$  (Fig. 1). Savanna species had significantly higher  $CT_{max}$  values on  
309 average than forest species ( $p < 0.001$ ,  $t = -17.309$ ,  $df = 52.37$ , Fig. 1A), and significantly lower  $CT_{min}$   
310 values on average than forest species ( $p < 0.001$ ,  $t = 8.7035$ ,  $df = 53.84$ , Fig. 1B); as a result, savanna  
311 species had wider thermal limits than forest species. The three *Cubitermes* species tested had  
312 significantly different  $CT_{max}$  values ( $p < 0.001$ ,  $F_{2,26} = 1424$ , Fig. 1A) and  $CT_{min}$  values ( $p < 0.001$ ,  $F_{2,26} =$   
313  $29.24$ , Fig. 1B), with all species having significantly different thermal niches from one another  
314 (Tukey's HSD; Fig. S2 & Fig. S3). *Macrotermes bellicosus* from multiple environments was tested  
315 (farmland in the forest zone and savanna), but  $CT_{max}$  did not differ among the two habitats ( $p =$

316 0.805,  $t = 0.255$ ,  $df = 7.775$ , Fig. 1A). *M. bellicosus* did, however, have significantly different  $CT_{min}$   
317 values ( $p = 0.008$ ,  $t = 3.132$ ,  $df = 12.266$ , Fig. 1B), with savanna colonies having lower  $CT_{min}$ .

318 *Fig 1A and B here.*

### 319 **Critical thermal maximum**

320 *Fig 2 here.*

321 The full model retained all three fixed effects (canopy cover, maximum temperature and average  
322 daily rainfall; Table 2), but the interaction between the terms were removed during the model  
323 selection process. Of the three remaining variables, only canopy cover had a significant negative  
324 correlation with colony  $CT_{max}$  ( $z = 3.138$ ,  $p = 0.001$ ,  $df = 63.470$ ; Fig. 1A; Table 2), suggesting that as  
325 the canopy cover above termite mounds increases, the average critical thermal maximum of the  
326 termite colony decreases (Fig. 2). Despite being retained in the full model, neither maximum  
327 temperature ( $z = 1.215$ ,  $p = 0.358$ ,  $df = 3.900$ ; Table 2) nor rainfall ( $z = 0.068$ ,  $p = 0.964$ ,  $df = 3.689$ ;  
328 Table 2) showed a significant correlation with colony  $CT_{max}$ . The single random effect of colony  
329 location (Table 1) explained 48.6% of the variation in the model.

330 *Table 2 here.*

### 331 **Critical thermal minimum**

332 *Fig 3 here.*

333 The full critical thermal minimum model retained two fixed effects (canopy cover and average daily  
334 rainfall; Table 3), and it also removed all interactions between the variables. Unlike in the  $CT_{max}$   
335 model, canopy cover was not significantly correlated with  $CT_{min}$  of termite colonies ( $z = 0.269$ ,  $p =$   
336  $0.788$ ,  $df = 59.671$ ; Fig. 1B; Table 3); however, average daily rainfall was significantly positively  
337 correlated with  $CT_{min}$  ( $z = 2.679$ ,  $p = 0.007$ ,  $df = 4.504$ ; Fig. 1B; Table 3). Colony location (Table 1)  
338 explained 39.6% of variation in the model.

339 *Table 3 here.*

340

### 341 **Discussion**

342 Our findings support the hypothesis that savanna termite species have more extreme physiological  
343 tolerances, and developing these tolerances is likely to have been a key mechanism that has allowed  
344 termites to colonise savanna environments. As predicted, savanna species had a significantly higher

345  $CT_{max}$  than forest species. In addition,  $CT_{max}$  had a significant negative correlation with canopy cover.  
346 As the canopy cover decreases the amount of sunlight reaching the soil surface and the surface of  
347 the mound increases, which will increase the temperature of the air, soil surface, and potentially  
348 within the mound and foraging areas (Hardwick et al., 2015). Canopy cover in our savanna  
349 environments (average  $26.6 \pm 5.8\%$ ) was much lower than that found in tropical forests ( $84.7 \pm$   
350  $3.1\%$ ). To cope with higher day temperatures in savannas, the termites will have had to develop  
351 mechanisms such as increased thermal tolerance. Our data support this idea, not only due to the  
352 positive correlation between canopy openness and  $CT_{max}$ , but also among closely related species  
353 (e.g., of *Cubitermes*) in which species in the more open and extreme savanna habitat had more  
354 extreme thermal limits (Fig. 1A & Fig. 1B). *Cubitermes* are soil feeding termites, so do not need to  
355 leave the protection of the soil to forage for food and so have a reduced interaction with ambient  
356 conditions (when compared to other species), yet they have significantly different thermal  
357 tolerances between species from the two environments. If these species had developed extensive  
358 mound thermoregulatory mechanisms such that the environmental conditions experienced by the  
359 termites were similar, we would expect closely related (i.e., congeneric) species to have similar  
360 thermal tolerances, irrespective of the location they were sampled from; this is not the case with  
361 *Cubitermes*, as closely related species have significantly different thermal tolerances.

362 Surprisingly, despite savanna species having a significantly lower  $CT_{min}$  than forest species,  $CT_{min}$  was  
363 not significantly correlated with canopy cover. We expected that lower canopy cover in savannas  
364 would allow the ground surface to cool more rapidly at night, and result in lower temperatures.  
365 Consequently, we expected canopy cover to positively correlate with  $CT_{min}$ , as termites in locations  
366 with lower canopy cover will experience lower temperatures at night. This is not what was found;  
367  $CT_{min}$  was significantly positively correlated with average daily rainfall. We are unsure about the  
368 underlying process linking lower  $CT_{min}$  with reduced rainfall. The species from the savanna regions  
369 had lower  $CT_{min}$  values, which has lower rainfall and therefore lower cloud cover, which would  
370 increase heat loss and result in lower temperatures; however, minimum temperature was included  
371 in the model and had no significant effect. More sampling is required, additional species from more  
372 locations along the environmental gradient, including between the forest and savanna  
373 environments, and further north of our savanna sites (in locations which would have higher day  
374 temperatures, and lower night temperatures) to properly tease apart these relationships.

375 Canopy cover was expected to have a significant relationship with  $CT_{min}$  because some termite  
376 species forage during cool parts of the day, including night time, which would put pressure on the  
377  $CT_{min}$  of foraging individuals, and that pressure would be greater in areas with low canopy cover

378 where the less heat would be retained overnight. For example, the specialist savanna grass-feeder,  
379 *Trinervitermes*, typically forages at dusk, dawn or during the night (Adam et al., 2008). Our data  
380 support this: *Trinervitermes germinatus* had the lowest  $CT_{min}$ , which would be expected for coping  
381 with the lower temperatures experienced during foraging at night. Other studies have shown that  
382 some savanna species (e.g. *Macrotermes* sp.; Darlington, 1982) forage during cooler parts of the day  
383 or when overcast (Evans and Gleeson, 2001; Parr pers obs); however, these studies are few in  
384 number and do not cover the species studied here. In general, behavioural avoidance of one thermal  
385 extreme (e.g., in the case of *Trinervitermes*, hot conditions) may reduce selection pressures on the  
386 physiological tolerance of that extreme (e.g.  $CT_{max}$ ), but not necessarily the opposite extreme. This  
387 interplay between behavioural and physiological adaptations represents an important avenue for  
388 future study.

389 Mean site temperature did not have a significant effect on thermal tolerance at maximum or  
390 minimum temperatures. This may be because the temperature data used in both models was  
391 interpolated temperature of air (Fick and Hijmans, 2017), which is unlikely to be the best measure of  
392 the conditions that termites would experience. Due to their small size, terrestrially foraging termites  
393 forage in the thermal boundary layer, immediately above a surface of, in this case, the ground. The  
394 thermal boundary layer has very different conditions from the recorded air temperature, both  
395 during the day (where it is likely to be super-heated) and at night (retaining more heat due to  
396 proximity to soil). Boundary layer temperature, or ground surface temperature, would be a more  
397 accurate representation of the true thermal conditions that termites experience, but unfortunately  
398 these data were not available at a fine-enough spatial scale. So, while it is likely that air temperature  
399 and ground temperature are correlated, and lack of ground temperature does not invalidate these  
400 results, the model would be improved by access to these data.

401 There was more intraspecific variation in  $CT_{min}$  than  $CT_{max}$  possibly associated with measurement  
402 error. The protocol for recording  $CT_{min}$  used for other insects, such as ants (Bishop et al., 2018;  
403 Kaspari et al., 2015), involves recording the temperature at which all movement ceases. However,  
404 termites are much less mobile than ants, making it extremely difficult to tell the difference between  
405 the onset of a chill coma (Hazell and Bale, 2011) and the true  $CT_{min}$ . Therefore, whereas the values  
406 described here are biologically relevant, as termite fitness would be severely negatively affected if  
407 temperatures were to drop to near these recorded " $CT_{min}$ " values, the values recorded likely contain  
408 measurement error. An additional method to test for signs of life in other insects is to shine a laser  
409 pen into the eye of the individual in an attempt to elicit a head-movement response. This method is  
410 not possible with termites, as the helper castes of almost all species lack eyes, so the only stimulus

411 that could be used was flicking the test tube. Another source of error is that a ‘no movement’  
412 reaction in a living individual is impossible to distinguish visually from a dead individual.  
413 Consequently, these measurements may slightly underestimate true  $CT_{min}$ , resulting in greater  
414 intraspecific variation than the true range. However, the measurement errors are likely to be  
415 random, rather than systematically correlated with environmental variables. Moreover, despite the  
416 measurement inaccuracies,  $CT_{min}$  correlated significantly with rainfall, and the differences in  $CT_{min}$   
417 between the species were pronounced.

418 Although we think it unlikely that there are mound thermoregulatory mechanisms in the *Cubitermes*  
419 species we sampled because of their very different thermal limits, our data are equivocal as to  
420 whether there is mound thermoregulation in *Macrotermes bellicosus* mounds. This is a topic of  
421 much debate (Korb, 2003; Jones and Oldroyd, 2006; Gouttefarde et al., 2017; Scott Turner, 1994;  
422 Turner, 2001). *Macrotermes bellicosus* had the same  $CT_{max}$  in all locations sampled despite  
423 environmental conditions varying among habitats; this suggests that there may be thermoregulatory  
424 mechanisms within their mounds, likely to maintain ideal growing conditions for their fungus  
425 symbionts (Korb and Linsenmair, 2000; Korb, 2003). We sampled them from their native region  
426 (savanna) and further south of their ancestral distribution, areas which have less extreme  
427 environmental conditions, particularly a much lower maximum temperature, which would not put  
428 any additional pressure on their thermal limits. Improved knowledge of likely thermoregulation in  
429 *Macrotermes* mounds could come from comparisons of thermal tolerances of *M. bellicosus* from  
430 multiple savanna environments, with varying climatic conditions (e.g. further north from where we  
431 sampled, with a hotter and drier climate).

432 As predicted by the thermal adaptation hypothesis, the forest species had much narrower thermal  
433 limits than the savanna species (Angilletta, 2009). Forests have more stable temperatures (less  
434 diurnal and annual variation), so the theory posits that the termite species found there should have  
435 narrower thermal limits than the savanna species. This prediction of the thermal adaptation  
436 hypothesis holds true, and it is likely that the stability, and lower extremes, of forest environments  
437 have contributed to narrower thermal limits (and therefore thermal niches) of forest termite  
438 species. How close the current temperatures are to termite thermal limits is not known, however,  
439 due to the imprecise nature of the temperature data. Obtaining more accurate temperate data,  
440 which measures surface temperature or boundary layer temperature, over a finer spatial scale, and  
441 recorded from a more recent time period would allow us to make a more accurate prediction of the  
442 resilience of termite assemblages to a warming climate. Understanding how close the thermal

443 conditions that termites experience are to their thermal limits, and to thermal optima, is vital in  
444 making this prediction.

445 Our results suggest that for termites, the most important soil macroinvertebrates in savanna  
446 environments (Davies et al., 2016a; Jouquet et al., 2016), a key mechanism that has facilitated their  
447 colonisation of the seasonal, climatically extreme environments of savannas from forests is the  
448 widening of their thermal tolerances. However, temperature is not the only variable that changes  
449 along an environmental gradient from forest to savanna. Food type, food availability, soil mineral  
450 content (and pH), humidity, predator diversity and abundance are a few of the factors that could  
451 change along the gradient, and therefore influence termite species distributions. Some of these  
452 would contribute to the large proportion of variation that is explained by the random effect of  
453 sampling location in both models, making them promising avenues for future research. For example,  
454 we have shown previously that desiccation tolerance is low in Bornean forest termites (Woon et al.,  
455 2018), so quantifying the desiccation tolerance of African species, and comparing these tolerances  
456 between environment types could provide additional information on how certain species are able to  
457 survive in savannas.

458 Understanding how termite physiology and behaviour changes across environmental gradients such  
459 as this one is particularly important in the context of climate change. The thermal adaptation  
460 hypothesis predicts that species in more stable environments will be more heavily impacted by  
461 warming conditions, due to those species operating closer to their thermal maximum (Angilletta,  
462 2009), and be more susceptible to extinction. This suggests the forest species here may be more  
463 vulnerable to rising temperatures associated with climate change, but more research is needed to  
464 understand the complexities of physiological change, how it affects termite distributions, and how  
465 they might be altered by the changing climate.

466 Our data suggest that the widening of termite thermal tolerances has occurred in species that have  
467 established in areas of more extreme climatic conditions, and that is likely a large factor in allowing  
468 termites to persist, speciate, and become ecologically dominant in arid, tropical environments.  
469 Whether the widening of these physiological limits will make them more resilient to climate change  
470 is a question that remains to be answered.



471

472

473

474

475

476

477

478

479

480

481

482

483

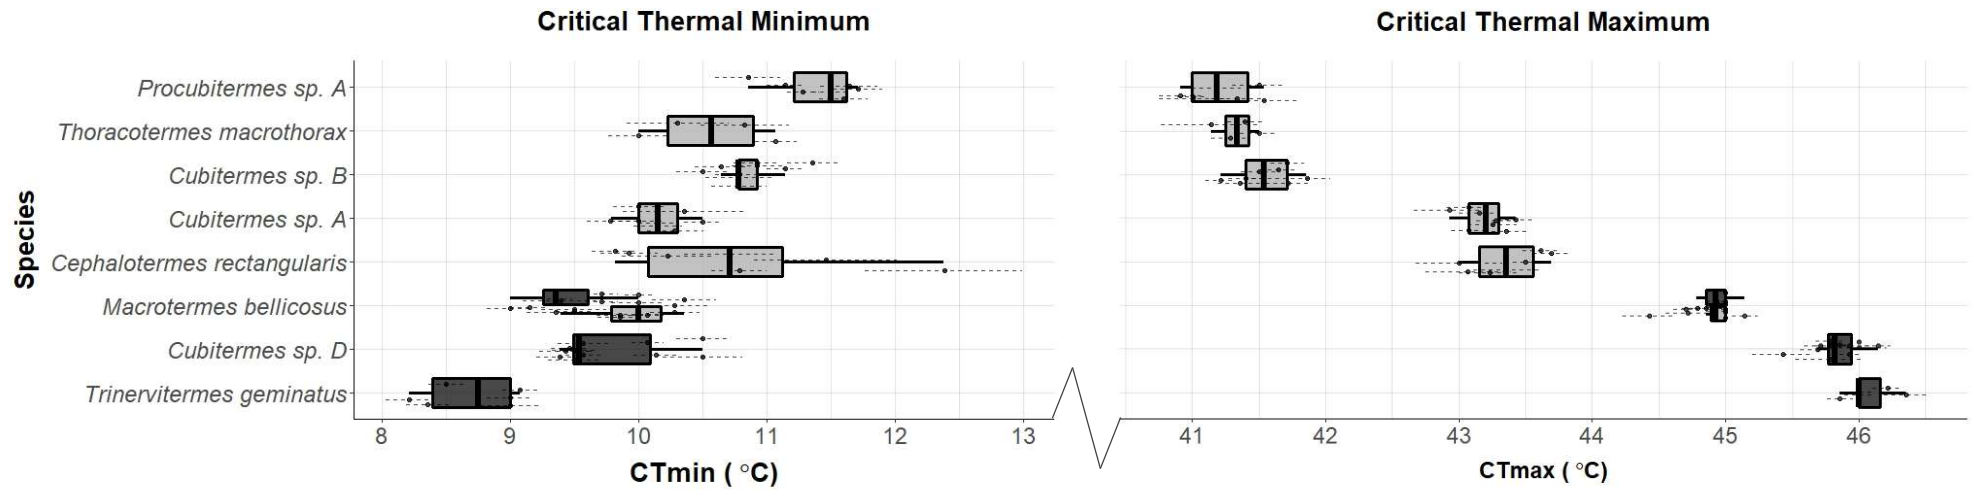

**Fig. 1** – Relationship between termite species thermal limits and the habitat they were sampled from. Species are ordered from lowest CTmax (top) to highest CTmax (bottom). Colour of the boxplot denotes the location the termites were sampled, dark-grey from savanna and light-grey from forest. *Macrotermes bellicosus* was sampled from both savanna and forest environments, and so it has distinct boxplots for each community. The points represent the estimated thermal limit of a unique termite colony, and the dotted lines represent the standard error around the colony average. Central thick line of the boxplot represents the species median thermal limit, the box represents the interquartile range, and the whiskers the upper and lower adjacent values.

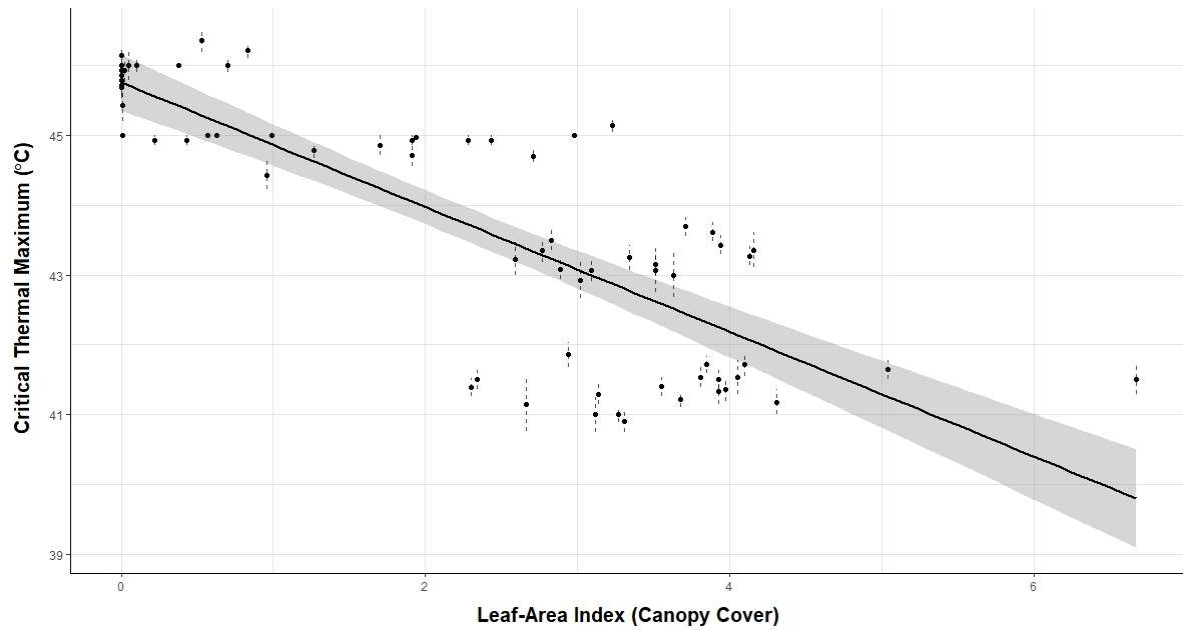

484 **Fig. 2** – Significant negative correlation between the estimated critical thermal maximum of termite  
485 colonies and the canopy cover above the colony centre ( $p = 0.001$ ), as predicted by a linear mixed  
486 effects model (with sampling location as the random effect). Leaf-area index is the measurement of  
487 canopy cover used, with higher leaf-area index representing higher canopy cover above the mound.  
488 Each point represents the estimated thermal maximum of a unique termite colony across all  
489 locations sampled, the thermal maximum is averaged from each individual termite that was used in  
490 the experiment, and the dotted line represents the standard error around this mean. The solid black  
491 line represents predicted relationship based on the model, with the shaded grey area representing  
492 the uncertainty around these predictions.

493

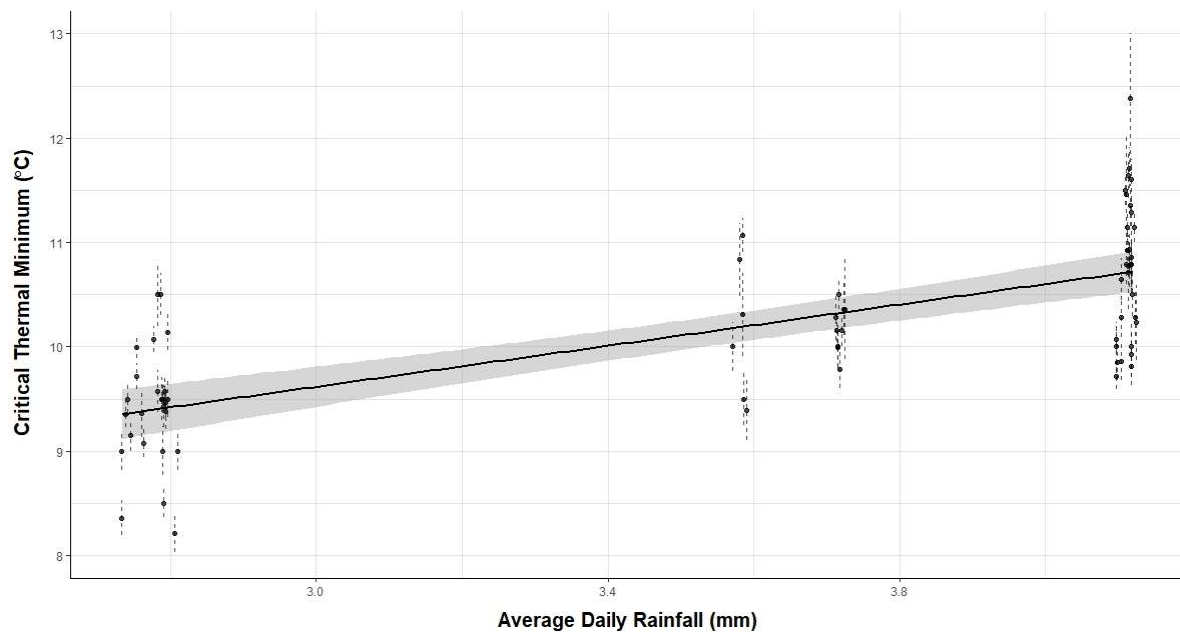

494 **Fig. 3** - Significant positive correlation between average daily rainfall at the mound (data obtained  
495 from WorldClim2, Fick and Hijmans, 2017), and the estimated critical thermal minimum of termite  
496 colonies ( $p = 0.007$ ), as predicted by a linear mixed effects model (with sampling location as the  
497 random effect). Each point represents the estimated thermal minimum of a unique termite colony  
498 across all locations sampled, the thermal minimum is averaged from each individual termite that was  
499 used in the experiment, and the dotted line represents the standard error around this mean. The solid  
500 black line represents predicted relationship based on the model, with the shaded grey area  
501 representing the uncertainty around these predictions.

502 **Table 1** – Summary statistics of the different sampling sites, with their locations and climatic  
503 conditions. The GPS co-ordinates are a representative location, at the approximate centre of the  
504 sampling location. Climate data sourced from WorldClim 2 (Fick and Hijmans, 2017).

| Location                                     | Vegetation type            | GPS Co-ordinates    | Mean Maximum Temperature | Mean Minimum Temperature | Mean Annual Rainfall |
|----------------------------------------------|----------------------------|---------------------|--------------------------|--------------------------|----------------------|
| Bobiri Forest Reserve                        | Rainforest                 | 6.689 N,<br>1.342 W | 31.3°C                   | 18.5°C                   | 1306 mm              |
| Forestry Research Institute of Ghana (FoRIG) | Rainforest                 | 6.716 N,<br>1.529 W | 31.4°C                   | 19°C                     | 1357 mm              |
| Kakum Farmland                               | Farmland (formerly forest) | 5.568 N,<br>1.388 W | 31°C                     | 19.8°C                   | 1504 mm              |
| Kakum National Park                          | Rainforest                 | 5.573 N,<br>1.379 W | 30.9°C                   | 19.7°C                   | 1502 mm              |
| Mole North                                   | Savanna                    | 9.334 N,<br>1.868 W | 35.2°C                   | 19.3°C                   | 1018 mm              |
| Mole South                                   | Savanna                    | 9.286 N,<br>1.847 W | 35.2°C                   | 19.3°C                   | 1025 mm              |

505

506

507

508

509

510

511

512

513

514

515

516

517

518 **Table 2** – ‘Full’ averaged model coefficients and their significance as produced by the ‘AICcmodavg’  
 519 package (Mazerolle and Linden, 2019) modelling termite  $CT_{max}$  change as a function of environmental  
 520 factors. The full model fitted the following fixed effects and a single random effect of sampling  
 521 location to predict the critical thermal maximum of termite colonies. Asterisks indicate level of  
 522 significance.

523

| Model Parameter        | Full model-<br>averaged coefficient | Lower CI | Upper CI | z-value | p-value         |
|------------------------|-------------------------------------|----------|----------|---------|-----------------|
| <i>Intercept</i>       | 31.984                              | 13.772   | 50.196   | 1.756   | 0.079           |
| Leaf-Area Index        | -0.367                              | -0.483   | -0.250   | 3.138   | 0.001 **<br>525 |
| Maximum Temperature    | 0.385                               | -0.034   | 0.804    | 0.919   | 0.358           |
| Average Daily Rainfall | 0.063                               | -1.340   | 1.466    | 0.045   | 0.964<br>526    |

527

528

529

530 **Table 3** – ‘Full’ averaged model coefficients and their significance as produced by the ‘AICcmodavg’  
 531 package (Mazerolle and Linden, 2019) modelling termite  $CT_{min}$  change as a function of environmental  
 532 factors. The full model fitted the following fixed effects and a single random effect of sampling  
 533 location to predict the critical thermal minimum of termite colonies. Asterisks indicate level of  
 534 significance.

| Model Parameter        | Full model-<br>averaged coefficient | Lower CI | Upper CI | z-value | p-value               |
|------------------------|-------------------------------------|----------|----------|---------|-----------------------|
| <i>Intercept</i>       | 6.878                               | 5.714    | 8.042    | 5.910   | 2e <sup>-16</sup> *** |
| Average Daily Rainfall | 0.885                               | 0.555    | 1.216    | 2.679   | 0.007 **              |
| Leaf-Area Index        | 0.011                               | -0.030   | 0.052    | 0.269   | 0.788                 |

535

536 **References**

- 537 **Aanen, D. K. and Eggleton, P.** (2005). Fungus-growing termites originated in African rain forest.  
538 *Current Biology* **15**, 851–855.
- 539 **Adam, R. A., Mitchell, J. D. and Westhuizen, M. C. van der** (2008). Aspects of foraging in the  
540 harvester termite, *Trinervitermes trinervoides* (Sjöstedt) (Termitidae: Nasutitermitinae).  
541 *African Entomology* **16**, 153–161.
- 542 **Adjorlolo, C., Mutanga, O., Cho, M. A. and Ismail, R.** (2012). Challenges and opportunities in the use  
543 of remote sensing for C3 and C4 grass species discrimination and mapping. *African Journal of*  
544 *Range & Forage Science* **29**, 47–61.
- 545 **Angilletta, M. J.** (2009). *Thermal Adaptation: A Theoretical and Empirical Synthesis*. Oxford  
546 University Press.
- 547 **Angilletta, M. J., Niewiarowski, P. H. and Navas, C. A.** (2002). The evolution of thermal physiology in  
548 ectotherms. *Journal of Thermal Biology* **27**, 249–268.
- 549 **Bartoń, K.** (2019). *MuMIn: Multi-Model Inference*. <https://CRAN.R-project.org/package=MuMIn>
- 550 **Bates, D., Maechler, M., Bolker, Walker, S., Christensen, R. H. B., Singmann, H., Dai, B., Scheipl, F.,**  
551 **Grothendieck, G., Green, P., & Fox, J.** (2019). *lme4: Linear Mixed-Effects Models using*  
552 *“Eigen” and S4*. <https://CRAN.R-project.org/package=lme4>
- 553 **Bishop, T. R., Robertson, M. P., Van Rensburg, B. J. and Parr, C. L.** (2018). Coping with the cold:  
554 minimum temperatures and thermal tolerances dominate the ecology of mountain ants.  
555 *Ecological Entomology* 105–114.
- 556 **Bottinelli, N., Jouquet, P., Capowiez, Y., Podwojewski, P., Grimaldi, M. and Peng, X.** (2015). Why is  
557 the influence of soil macrofauna on soil structure only considered by soil ecologists? *Soil and*  
558 *Tillage Research* **146**, 118–124.
- 559 **Bouchenak-Khelladi, Y., Slingsby, J. A., Verboom, G. A. and Bond, W. J.** (2014). Diversification of C4  
560 grasses (Poaceae) does not coincide with their ecological dominance. *American Journal of*  
561 *Botany* **101**, 300–307.

- 562 **Bourguignon, T., Lo, N., Cameron, S. L., Šobotník, J., Hayashi, Y., Shigenobu, S., Watanabe, D.,**  
563 **Roisin, Y., Miura, T. and Evans, T. A.** (2015). The Evolutionary History of Termites as Inferred  
564 from 66 Mitochondrial Genomes. *Molecular Biology & Evolution* **32**, 406–421.
- 565 **Buckley, L. B., Tewksbury, J. J. and Deutsch, C. A.** (2013). Can terrestrial ectotherms escape the heat  
566 of climate change by moving? *Proceedings of the Royal Society B: Biological Sciences* **280**,  
567 20131149.
- 568 **Burnham, K. P. and Anderson, D. R.** (2002). Model selection and multimodel inference: A practical  
569 information-theoretic approach. In *A Primer on Natural Resource Science*, p. Texas A&M  
570 University Press.
- 571 **Cerling, T. E., Wang, Y. and Quade, J.** (1993). Expansion of C4 ecosystems as an indicator of global  
572 ecological change in the late Miocene. *Nature* **361**, 344–345.
- 573 **Cerling, T. E., Harris, J. M., MacFadden, B. J., Leakey, M. G., Quade, J., Eisenmann, V. and**  
574 **Ehleringer, J. R.** (1997). Global vegetation change through the Miocene/Pliocene boundary.  
575 *Nature* **389**, 153–158.
- 576 **Christin, P.-A., Osborne, C. P., Chatelet, D. S., Columbus, J. T., Besnard, G., Hodkinson, T. R.,**  
577 **Garrison, L. M., Vorontsova, M. S. and Edwards, E. J.** (2013). Anatomical enablers and the  
578 evolution of C4 photosynthesis in grasses. *PNAS* **110**, 1381–1386.
- 579 **Clusella-Trullas, S., Blackburn, T. M. and Chown, S. L.** (2011). Climatic predictors of temperature  
580 performance curve parameters in ectotherms imply complex responses to climate change.  
581 *The American Naturalist* **177**, 738–751.
- 582 **Dangerfield, J. M., McCarthy, T. S. and Ellery, W. N.** (1998). The mound-building termite  
583 *Macrotermes michaelseni* as an ecosystem engineer. *Journal of Tropical Ecology* **14**, 507–  
584 520.
- 585 **Darlington, J. P. E. C.** (1982). The underground passages and storage pits used in foraging by a nest  
586 of the termite *Macrotermes michaelseni* in Kajiado, Kenya. *Journal of Zoology* **198**, 237–247.
- 587 **Davies, A. B., Robertson, M. P., Levick, S. R., Asner, G. P., Rensburg, B. J. van and Parr, C. L.** (2014).  
588 Variable effects of termite mounds on African savanna grass communities across a rainfall  
589 gradient. *Journal of Vegetation Science* **25**, 1405–1416.



- 590 **Davies, A. B., Levick, S. R., Robertson, M. P., Rensburg, B. J. van, Asner, G. P. and Parr, C. L.** (2016a).  
591 Termite mounds differ in their importance for herbivores across savanna types, seasons and  
592 spatial scales. *Oikos* **125**, 726–734.
- 593 **Davies, A. B., Baldeck, C. A. and Asner, G. P.** (2016b). Termite mounds alter the spatial distribution  
594 of African savanna tree species. *Journal of Biogeography* **43**, 301–313.
- 595 **Davies, T. J., Daru, B. H., Bezeng, B. S., Charles-Dominique, T., Hempson, G. P., Kabongo, R. M.,**  
596 **Maurin, O., Muasya, A. M., van der Bank, M. and Bond, W. J.** (2020). Savanna tree  
597 evolutionary ages inform the reconstruction of the paleoenvironment of our hominin  
598 ancestors. *Scientific Reports* **10**, 12430.
- 599 **Dierks, A. and Fischer, K.** (2008). Feeding responses and food preferences in the tropical, fruit-  
600 feeding butterfly, *Bicyclus anynana*. *Journal of Insect Physiology* **54**, 1363–1370.
- 601 **D’Onofrio, D., Sweeney, L., von Hardenberg, J. and Baudena, M.** (2019). Grass and tree cover  
602 responses to intra-seasonal rainfall variability vary along a rainfall gradient in African tropical  
603 grassy biomes. *Scientific Reports* **9**, 2334.
- 604 **Eggleton, P.** (2000). Global patterns of termite diversity. In *Termites: Evolution, Sociality, Symbioses,*  
605 *Ecology* (ed. Abe, T., Bignell, D. E., and Higashi, M.), pp. 25–51. Dordrecht: Springer  
606 Netherlands.
- 607 **Evans, T. A. and Gleeson, P. V.** (2001). Seasonal and daily activity patterns of subterranean, wood-  
608 eating termite foragers. *Australian Journal of Zoology* **49**, 311–321.
- 609 **Fick, S. E. and Hijmans, R. J.** (2017). WorldClim 2: new 1-km spatial resolution climate surfaces for  
610 global land areas. *International Journal of Climatology* **37**, 4302–4315.
- 611 **Fox-Dobbs, K., Doak, D. F., Brody, A. K. and Palmer, T. M.** (2010). Termites create spatial structure  
612 and govern ecosystem function by affecting N<sub>2</sub> fixation in an East African savanna. *Ecology*  
613 **91**, 1296–1307.
- 614 **Frazer, G. W., Canham, C. D. and Lertzman, K. P.** (1999). *Gap Light Analyzer (GLA), Version 2.0:*  
615 *Imaging software to extract canopy structure and gap light transmission indices from true-*  
616 *colour fisheye photographs.*

- 617 **Gouttefarde, R., Bon, R., Fourcassié, V., Arrufat, P., Hafig, I., Baehr, C. and Jost, C. (2017).**  
618 Investigating termite nest thermodynamics using a quick-look method and the heat  
619 equation. *bioRxiv* 161075.
- 620 **Gvoždík, L. (2018).** Just what is the thermal niche? *Oikos* **127**, 1701–1710.
- 621 **Halali, S., Brakefield, P. M., Collins, S. C. and Brattström, O. (2020).** To mate, or not to mate: The  
622 evolution of reproductive diapause facilitates insect radiation into African savannahs in the  
623 Late Miocene. *Journal of Animal Ecology* **89**, 1230–1241.
- 624 **Hardwick, S. R., Toumi, R., Pfeifer, M., Turner, E. C., Nilus, R. and Ewers, R. M. (2015).** The  
625 relationship between leaf area index and microclimate in tropical forest and oil palm  
626 plantation: Forest disturbance drives changes in microclimate. *Agricultural and Forest*  
627 *Meteorology* **201**, 187–195.
- 628 **Hazell, S. P. and Bale, J. S. (2011).** Low temperature thresholds: Are chill coma and CTmin  
629 synonymous? *Journal of Insect Physiology* **57**, 1085–1089.
- 630 **Heath, J. E., Hanegan, J. L., Wilkin, P. J. and Heath, M. S. (1971).** Adaptation of the Thermal  
631 Responses of Insects. *American Zoologist* **11**, 147–158.
- 632 **Hellemans, S., Deligne, J., Roisin, Y. and Josens, G. (2020).** Phylogeny and revision of the  
633 ‘*Cubitermes* complex’ termites (Termitidae: Cubitermitinae). *Systematic entomology* **46**, 224-  
634 238.
- 635 **Hijmans, R. J., Etten, J. van, Sumner, M., Cheng, J., Bevan, A., Bivand, R., Busetto, L., Canty, M.,  
636 Forrest, D., Ghosh, A., et al. (2020).** *raster: Geographic Data Analysis and Modelling*.  
637 <https://CRAN.R-project.org/package=raster>.
- 638 **Huey, R. B. and Kingsolver, J. G. (1989).** Evolution of thermal sensitivity of ectotherm performance.  
639 *Trends in Ecology & Evolution* **4**, 131–135.
- 640 **Huey, R. B., Kearney, M. R., Krockenberger, A., Holtum, J. A. M., Jess, M. and Williams, S. E. (2012).**  
641 Predicting organismal vulnerability to climate warming: roles of behaviour, physiology and  
642 adaptation. *Philosophical Transactions of the Royal Society B: Biological Sciences* **367**, 1665–  
643 1679.
- 644 **Johnson, M., Zaretskaya, I., Raytselis, Y., Merezhuk, Y., McGinnis, S. and Madden, T. L. (2008).** NCBI  
645 BLAST: a better web interface. *Nucleic Acids Research* **36**, W5–W9.

- 646 **Jones, J. C. and Oldroyd, B. P.** (2006). Nest thermoregulation in social insects. In *Advances in Insect*  
647 *Physiology* (ed. Simpson, S. J.), pp. 153–191. Academic Press.
- 648 **Joseph, G. S., Seymour, C. L., Cumming, G. S., Cumming, D. H. M. and Mahangu, Z.** (2014). Termite  
649 mounds increase functional diversity of woody plants in African savannas. *Ecosystems* **17**,  
650 808–819.
- 651 **Jouquet, P., Bottinelli, N., Shanbhag, R. R., Bourguignon, T., Traoré, S. and Abbasi, S. A.** (2016).  
652 Termites: The neglected soil engineers of tropical soils. *Soil Science* **181**, 157–165.
- 653 **Kaspari, M., Clay, N. A., Lucas, J., Yanoviak, S. P. and Kay, A.** (2015). Thermal adaptation generates a  
654 diversity of thermal limits in a rainforest ant community. *Global Change Biology* **21**, 1092–  
655 1102.
- 656 **Kearney, M. and Porter, W.** (2009). Mechanistic niche modelling: combining physiological and  
657 spatial data to predict species' ranges. *Ecology Letters* **12**, 334–350.
- 658 **Kearney, M., Simpson, S. J., Raubenheimer, D. and Helmuth, B.** (2010). Modelling the ecological  
659 niche from functional traits. *Philosophical Transactions of the Royal Society B: Biological*  
660 *Sciences* **365**, 3469–3483.
- 661 **Kellermann, V., Overgaard, J., Hoffmann, A. A., Flojgaard, C., Svenning, J.-C. and Loeschcke, V.**  
662 (2012). Upper thermal limits of *Drosophila* are linked to species distributions and strongly  
663 constrained phylogenetically. *Proceedings of the National Academy of Sciences* **109**, 16228–  
664 16233.
- 665 **Kingsolver, J. G. and Gomulkiewicz, R.** (2003). Environmental variation and selection on  
666 performance curves. *Integrative and Comparative Biology* **43**, 470–477.
- 667 **Korb, J.** (2003). Thermoregulation and ventilation of termite mounds. *Naturwissenschaften* **90**, 212–  
668 219.
- 669 **Korb, J. and Linsenmair, K. E.** (2000). Thermoregulation of termite mounds: What role does ambient  
670 temperature and metabolism of the colony play? *Insectes sociaux* **47**, 357–363.
- 671 **Legendre, F., Whiting, M. F., Bordereau, C., Canello, E. M., Evans, T. A. and Grandcolas, P.** (2008).  
672 The phylogeny of termites (Dictyoptera: Isoptera) based on mitochondrial and nuclear  
673 markers: Implications for the evolution of the worker and pseudergate castes, and foraging  
674 behaviors. *Molecular Phylogenetics and Evolution* **48**, 615–627.

- 675 **Mazerolle, M. J. and Linden, D.** (2019). *AICcmodavg: Model Selection and Multimodel Inference*  
676 *Based on (Q)AIC(c)*. <https://CRAN.R-project.org/package=AICcmodavg>.
- 677 **Mokany, K., Raison, R. J. and Prokushkin, A. S.** (2006). Critical analysis of root: shoot ratios in  
678 terrestrial biomes. *Global Change Biology* **12**, 84–96.
- 679 **Nicholls, N. and Wong, K. K.** (1990). Dependence of rainfall variability on mean rainfall, latitude, and  
680 the Southern Oscillation. *Journal of Climate* **3**, 163–170.
- 681 **Noirot, C. and Darlington, J. P. E. C.** (2000). Termite nests: Architecture, regulation and defence. In  
682 *Termites: Evolution, Sociality, Symbioses, Ecology* (ed. Abe, T., Bignell, D. E., and Higashi, M.),  
683 pp. 121–139. Dordrecht: Springer Netherlands.
- 684 **Ocko, S. A., King, H., Andreen, D., Bardunias, P., Turner, J. S., Soar, R. and Mahadevan, L.** (2017).  
685 Solar-powered ventilation of African termite mounds. *Journal of Experimental Biology* **220**,  
686 3260–3269.
- 687 **Pagani, M., Freeman, K. H. and Arthur, M. A.** (1999). Late Miocene atmospheric CO<sub>2</sub> concentrations  
688 and the expansion of C<sub>4</sub> grasses. *Science* **285**, 876–879.
- 689 **Parkash, R., Rajpurohit, S. and Ramniwas, S.** (2008). Changes in body melanisation and desiccation  
690 resistance in highland vs. lowland populations of *D. melanogaster*. *Journal of Insect*  
691 *Physiology* **54**, 1050–1056.
- 692 **Parr, C. L., Lehmann, C. E. R., Bond, W. J., Hoffmann, W. A. and Andersen, A. N.** (2014). Tropical  
693 grassy biomes: misunderstood, neglected, and under threat. *Trends in Ecology & Evolution*  
694 **29**, 205–213.
- 695 **Pearcy, R. W. and Ehleringer, J.** (1984). Comparative ecophysiology of C<sub>3</sub> and C<sub>4</sub> plants. *Plant, Cell &*  
696 *Environment* **7**, 1–13.
- 697 **Poissonnier, L.-A., Arganda, S., Simpson, S. J., Dussutour, A. and Buhl, J.** (2018). Nutrition in  
698 extreme food specialists: An illustration using termites. *Functional Ecology* **32**, 2531–2541.
- 699 **Porter, E. E. and Hawkins, B. A.** (2001). Latitudinal gradients in colony size for social insects:  
700 Termites and ants show different patterns. *The American Naturalist* **157**, 97–106.
- 701 **Porter, W. P. and Kearney, M.** (2009). Size, shape, and the thermal niche of endotherms. *PNAS* **106**,  
702 19666–19672.

- 703 **R Core Team** (2019). *R: A language and environment for statistical computing*. Vienna, Austria.
- 704 **Rajpurohit, S., Parkash, R. and Ramniwas, S.** (2008). Body melanization and its adaptive role in  
705 thermoregulation and tolerance against desiccating conditions in drosophilids.  
706 *Entomological Research* **38**, 49–60.
- 707 **Roisin, Y.** (2000). Diversity and evolution of caste patterns. In *Termites: Evolution, Sociality,*  
708 *Symbioses, Ecology* (ed. Abe, T., Bignell, D. E., and Higashi, M.), pp. 95–119. Dordrecht:  
709 Springer Netherlands.
- 710 **Scott Turner, J.** (1994). Ventilation and thermal constancy of a colony of a southern African termite  
711 (*Odontotermes transvaalensis*: Macrotermitinae). *Journal of Arid Environments* **28**, 231–248.
- 712 **Simon, M. F. and Pennington, T.** (2012). Evidence for Adaptation to Fire Regimes in the Tropical  
713 Savannas of the Brazilian Cerrado. *International Journal of Plant Sciences* **173**, 711–723.
- 714 **Singh, K., Muljadi, B. P., Raeini, A. Q., Jost, C., Vandeginste, V., Blunt, M. J., Theraulaz, G. and**  
715 **Degond, P.** (2019). The architectural design of smart ventilation and drainage systems in  
716 termite nests. *Science Advances* **5**, eaat8520.
- 717 **Solofondranohatra, C. L., Vorontsova, M. S., Hackel, J., Besnard, G., Cable, S., Williams, J.,**  
718 **Jeannoda, V. and Lehmann, C. E. R.** (2018). Grass functional traits differentiate forest and  
719 savanna in the Madagascar Central Highlands. *Frontiers in Ecology & Evolution* **6**, 184.
- 720 **Sternberg, L. D. S. L.** (2001). Savanna–forest hysteresis in the tropics. *Global Ecology and*  
721 *Biogeography* **10**, 369–378.
- 722 **Still, C. J., Pau, S. and Edwards, E. J.** (2014). Land surface skin temperature captures thermal  
723 environments of C3 and C4 grasses. *Global Ecology and Biogeography* **23**, 286–296.
- 724 **Støen, O.-G., Okullo, P., Eid, T. and Moe, S. R.** (2013). Termites facilitate and ungulates limit savanna  
725 tree regeneration. *Oecologia* **172**, 1085–1093.
- 726 **Sunday, J. M., Bates, A. E. and Dulvy, N. K.** (2011). Global analysis of thermal tolerance and latitude  
727 in ectotherms. *Proceedings of the Royal Society B: Biological Sciences* **278**, 1823–1830.
- 728 **Sunday, J. M., Bates, A. E., Kearney, M. R., Colwell, R. K., Dulvy, N. K., Longino, J. T. and Huey, R. B.**  
729 (2014). Thermal-safety margins and the necessity of thermoregulatory behavior across  
730 latitude and elevation. *PNAS* 201316145.

- 731 **Tang, H., Armston, J., Hancock, S., Marselis, S., Goetz, S. and Dubayah, R.** (2019). Characterizing  
732 global forest canopy cover distribution using spaceborne lidar. *Remote Sensing of*  
733 *Environment* **231**, 111262.
- 734 **Traniello, J. F. A. and Leuthold, R. H.** (2000). Behavior and ecology of foraging in termites. In  
735 *Termites: Evolution, Sociality, Symbioses, Ecology* (ed. Abe, T., Bignell, D. E., and Higashi, M.),  
736 pp. 141–168. Dordrecht: Springer Netherlands.
- 737 **Turner, J. S.** (2001). On the mound of *Macrotermes michaelseni* as an organ of respiratory gas  
738 exchange. *Physiological and Biochemical Zoology* **74**, 798–822.
- 739 **Turner, J. S.** (2019). Termites as mediators of the water economy of arid savanna ecosystems. In  
740 *Dryland Ecohydrology* (ed. D’Odorico, P., Porporato, A., and Wilkinson Runyan, C.), pp. 401–  
741 414. Cham: Springer International Publishing.
- 742 **Vesala, R., Harjuntausta, A., Hakkarainen, A., Rönholm, P., Pellikka, P. and Rikkinen, J.** (2019).  
743 Termite mound architecture regulates nest temperature and correlates with species  
744 identities of symbiotic fungi. *PeerJ* **6**, e6237.
- 745 **Wiafe, E. D.** (2016). Tree Species Composition of Kakum Conservation Area in Ghana. *Ecology and*  
746 *Evolutionary Biology* **1**, 14.
- 747 **Willmer, P. G.** (1982). Microclimate and the environmental physiology of insects. In *Advances in*  
748 *Insect Physiology* (ed. Berridge, M. J., Treherne, J. E., and Wigglesworth, V. B.), pp. 1–57.  
749 Academic Press.
- 750 **Wood, T. G. and Thomas, R. J.** (1989). The mutualistic association between Macrotermitinae and  
751 Termitomyces. In *Insect-Fungus Interactions*, pp. 69-80 p. Academic Press.
- 752 **Woon, J. S., Boyle, M. J. W., Ewers, R. M., Chung, A. and Eggleton, P.** (2018). Termite environmental  
753 tolerances are more linked to desiccation than temperature in modified tropical forests.  
754 *Insectes sociaux* **66**, 57-64.
- 755
